# Supplementary material
Source: PubMed Central journal article supplement (PMC3691860)
Supplement: NIHMS472702-supplement-1_si_001.pdf [file NIHMS472702-supplement-1_si_001.pdf]

## METHODS

Details for the calculations are given elsewhere [1] and summarized here. The inner sphere contribution,  $\Delta G_{\text{in}}$ , and partial charges for the redox site were calculated using broken-symmetry [2] density functional methods [3] (BS-DFT) with the B3LYP/6-31G(++)<sub>S</sub>\*\*//B3LYP/6-31G\*\* functional/basis set using the program NWChem [4] as previously described. [5] Here,  $\Delta G_{\text{in}} = -0.232$  eV and  $\Delta G_{\text{SHE}} = 0.43$  eV. The outer sphere contribution,  $\Delta G_{\text{out}}$ , was calculated using APBS [6], a program for solving the Poisson-Boltzmann equation, as described fully elsewhere. [1] A 51.2 Å cubic grid with a grid spacing of 0.2 Å was used for all calculations. The atomic radii and protein partial charges were from CHARMM22 parameters [7], and the probe radius for all Connolly [8] surfaces was  $r = 1.4$  Å. The dielectric regions were defined as the redox site with  $\epsilon_c = 1$ , the protein with  $\epsilon_p = 4$ , and the solvent with  $\epsilon_s = 78$ , and the ionic concentrations were zero. Building coordinates for hydrogens was carried out in CHARMM [9] version 35b1. Residue 11 of H42Q was labeled as an asparagine in the crystal structure in disagreement with the wt sequence so it was replaced by an aspartic acid as in the wt; however, the results do not change if the sequence in the crystal structure is used.

The  $E^\circ$  as a function of pH were calculated according to

$$A_{\text{His}} \equiv 10^{\text{p}K_a(\text{His})-\text{pH}}$$

$$A_{\text{Neg}} \equiv 10^{\text{p}K_a(\text{Neg})-\text{pH}}$$

$$a = \frac{1}{1 + A_{\text{Neg}}}$$

$$b = \frac{A_{\text{Neg}} - A_{\text{His}}}{(1 + A_{\text{Neg}})(1 + A_{\text{His}})}$$

$$c = \frac{A_{\text{His}}}{1 + A_{\text{His}}}$$

$$E^\circ = aE_a^\circ + bE_b^\circ + cE_c^\circ$$

where  $pK_a(\text{His})=6.3$ ,  $pK_a(\text{Neg})=3.5$ .  $E_a^\circ$ ,  $E_b^\circ$  and  $E_c^\circ$  are the calculated reduction potentials for the protein with all ionizable residues protonated, all ionizable residues with  $pK_a$  above 5 protonated, and all ionizable residues with  $pK_a$  above 8 protonated, respectively.

The error in the calculated  $E^\circ$  has been estimated as about 30 mV if high-resolution crystals are used. [10] The deviation appears to be mainly associated with small differences in the redox site geometry. Larger error may be associated with protein dynamics, changes in the redox site, or poorer resolution (larger than 1.5 Å resolution) structures. The experimental data shown here are performed using cyclic voltammetry with  $E^\circ$  reproducible to within 2 mV in 50 mM potassium phosphate buffer, 150 mM KCl [11] and are in good agreement with previous studies following the absorption spectra in 25 mM TAGP (Tris-sodium acetate-glycine-potassium phosphate buffer) with NaCl to total ionic strength of 140 mM. [12] The larger difference in the low pH results compared to experiment may be due to the lack of salt in the calculations or one or more glutamates or aspartates may have  $pK_a$  below 3.5 in the experiment. The lack of salt would raise the medium and high pH  $E^\circ$  since dielectric shielding of the surface charges, which are mostly negative, would increase  $E^\circ$ . We choose to overestimate rather than underestimate the effects of charged residues by omitting salt in the calculations.

1. Perrin Jr BS, Niu S, Ichiye T (2013) *J Comput Chem* 34:576
2. Noodleman L, Case DA In *Adv Inorg Chem*; Richard, C., Ed.; Academic Press: 1992; Vol. 38, p 423.
3. Parr RG, Yang W *Density-Functional Theory of Atoms and Molecules*; Oxford University Press: Oxford, 1989.
4. Valiev M, Bylaska EJ, Govind N, Kowalski K, Straatsma TP, van Dam HJJ, Wang D, Nieplocha J, Apra E, Windus TL, de Jong WA (2010) *Comput Phys Commun* 181:1477
5. Niu S, Ichiye T (2011) *Mol Simul* 37:572
6. Baker NA, Sept D, Joseph S, Holst MJ, McCammon JA (2001) *Proc Natl Acad Sci U S A* 98:10037
7. MacKerell Jr AD, Bashford D, Bellott M, Dunbrack Jr RL, Evanseck JD, Field MJ, Fischer S, Gao J, Guo H, Ha S, Joseph-McCarthy D, Kuchnir L, Kuczera K, Lau FTK, Mattos C, Michnick S, Ngo T, Nguyen DT, Prodhom B, Reiher WE, Roux B, Schlenkrich M, Smith JC, Stote R, Straub J, Watanabe M, Wiorkiewicz-Kuczera J, Yin D, Karplus M (1998) *J Phys Chem B* 102:3586
8. Connolly ML (1983) *Science* 221:709
9. Brooks BR, Brucoleri RE, Olafson BD, States DJ, Swaminathan S, Karplus M (1983) *J Comput Chem* 4:187
10. Perrin Jr BS, Ichiye T (2010) *Proteins: Struct, Funct, Bioinf* 78:2798
11. Babini E, Borsari M, Capozzi F (1998) *Inorg Chim Acta* 275-276:230
12. Mizrahi IA, Meyer TE, Cusanovich MA (1980) *Biochemistry* 19:4727
